# Supplementary material for: KRAS mutations are negatively correlated with immunity in colon cancer
Source: PubMed Central journal article supplement (PMC7834984; doi:10.18632/aging.202182), 2020-11-26
Supplement: aging-13-202182-s002.pdf [file aging-13-202182-s002.pdf]

**SUPPLEMENTARY TABLES**

**Supplementary Table 1. The genetic composition of 30 immune signatures.**

|                         |                                                                                                                                                                                                                                                                                                                                                                                                                                                                                                                                                                                                                                                                                                                                                                                                                                                                                                                                                                                                                                                                                                                                                                                                                                                                                                                                                                                                                                                                                                                                                                                                                                                                                                                                                    |
|-------------------------|----------------------------------------------------------------------------------------------------------------------------------------------------------------------------------------------------------------------------------------------------------------------------------------------------------------------------------------------------------------------------------------------------------------------------------------------------------------------------------------------------------------------------------------------------------------------------------------------------------------------------------------------------------------------------------------------------------------------------------------------------------------------------------------------------------------------------------------------------------------------------------------------------------------------------------------------------------------------------------------------------------------------------------------------------------------------------------------------------------------------------------------------------------------------------------------------------------------------------------------------------------------------------------------------------------------------------------------------------------------------------------------------------------------------------------------------------------------------------------------------------------------------------------------------------------------------------------------------------------------------------------------------------------------------------------------------------------------------------------------------------|
| aDCs                    | CD83;LAMP3;CCL1                                                                                                                                                                                                                                                                                                                                                                                                                                                                                                                                                                                                                                                                                                                                                                                                                                                                                                                                                                                                                                                                                                                                                                                                                                                                                                                                                                                                                                                                                                                                                                                                                                                                                                                                    |
| APC_co_inhibition       | C10orf54;CD274;LGALS9;PDCD1LG2;PVRL3                                                                                                                                                                                                                                                                                                                                                                                                                                                                                                                                                                                                                                                                                                                                                                                                                                                                                                                                                                                                                                                                                                                                                                                                                                                                                                                                                                                                                                                                                                                                                                                                                                                                                                               |
| APC_co_stimulation      | CD40;CD58;CD70;ICOSLG;SLAMF1;TNFSF14;TNFSF15;TNFSF18;TNFSF4;TNFSF8;TNFSF9                                                                                                                                                                                                                                                                                                                                                                                                                                                                                                                                                                                                                                                                                                                                                                                                                                                                                                                                                                                                                                                                                                                                                                                                                                                                                                                                                                                                                                                                                                                                                                                                                                                                          |
| B_cells                 | BACH2;BANK1;BLK;BTLA;CD79A;CD79B;FCRL1;FCRL3;HVCN1;RALGPS2                                                                                                                                                                                                                                                                                                                                                                                                                                                                                                                                                                                                                                                                                                                                                                                                                                                                                                                                                                                                                                                                                                                                                                                                                                                                                                                                                                                                                                                                                                                                                                                                                                                                                         |
| CCR                     | CCL16;TPO;TGFB2;CXCL2;CCL14;TGFB3;IL11RA;CCL11;IL411;IL33;CXCL12;CXCL10;BMPER;BMP8A;CXCL11;IL21R;IL17B;TNFRSF9;ILF2;CX3CR1;CCR8;TNFSF12;CSF3;TNFSF4;BMP3;CX3CL1;BMP5;CXCR2;TNFRSF10D;BMP2;CXCL14;CCL28;CXCL3;BMP6;CCL21;CXCL9;CCL23;IL6;TNFRSF18;IL17RD;IL17D;IL27;CCL7;IL1R1;CXCR4;CXCR2P1;TGFB11;IFNGR1;IL9R;IL1RAPL1;IL11;CSF1;IL20RA;IL25;TNFRSF4;IL18;ILF3;CCL20;TNFRSF12A;IL6ST;CXCL13;IL12B;TNFRSF8;IL6R;BMP2;IFNE;IL1RAPL2;IL3RA;BMP4;CCL24;TNFSF13B;CCR4;IL2RA;IL32;TNFRSF10C;IL22RA1;BMP1A;CXCR5;CXCR3;IFNA8;IL17REL;IFNB1;IFNAR1;TNFRSF1B;CCL17;IFNL1;IL16;IL1RL1;ILK;CCL25;ILDR2;CXCR1;IL36RN;IL34;TGFB1;IFNG;IL19;ILKAP;BMP2K;CCR10;ILDR1;EPO;CCR7;IL17C;IL23A;CCR5;IL7;EPOR;CCL13;IL2RG;IL31RA;TNFAIP6;IFNL2;BMP1;IL12RB1;TNFAIP8;IL4R;TNFRSF6B;TNFAIP8L1;TNFRSF10B;IFNL3;CCL5;CXCL6;CXCL1;CCR3;TNFSF11;CSF1R;IL21;IL1RAP;IL12RB2;CCL1;IL17RA;CCR1;IL1RN;TNFRSF11B;TNFRSF14;IL13;IL2RB;BMP8B;CCL2;IL24;IL18RAP;TGFB1;TNFSF10;TNFRSF11A;CXCL5;IL5RA;TNFSF9;IL1RL2;TNFRSF13C;IL36G;IL15RA;TNFRSF21;CXCL8;IL22RA2;TNFAIP8L2;IL18R1;IFNLR1;CXCR6;CCL3L3;TNFRSF1A;IL17RE;IFNGR2;IL17RC;TNFAIP8L3;ILVBL;TGFBAP1;CCL4L1;CSF2RA;CCRN4L;CCL26;TNFAIP1;CCRL2;IFNA10;TNFRSF17;IFNA13;IL20;IL18BP;CCL3L1;TNFSF12-TNFSF13;IL5;IL23R;IL26;TNF;TGFA;CSF2;IL1F10;CXCL17;TNFSF13;IFNA4;IL37;IL12A;IL7R;IFNA1;IL1A;IL4;IL2;CCL22;CSF3R;IL10;IFNK;TGFB2;IL1R2;IL1B;IL17F;IL27RA;IL15;TNFSF8;IL36B;XCL1;CXCL16;TNFRSF19;IL3;CCL3;IFNA2;BMP1B;IFNA21;TNFSF18;CCL8;IL17RB;TNFRSF25;IL22;IL10RB;IFNAR2;CCL18;IFNA16;CSF2RB;IL36A;TNFAIP3;IL13RA2;IL13RA1;CCR9;TNFRSF10A;IFNA7;IFNW1;XCL2;TNFSF14;CCR2;BMP15;BMP10;CCL15;CCL14;TGFB1;IFNA5;BMP7;IFNA14;IL20RB;IL10RA;IFNA17;CCR6;TGFB3;CCL15;CCL4;CCL27;TNFRSF13B;TNFAIP2;IL31;IL17A;TNFSF15;CCL19;IFNA6;IL9 |
| CD8+_T_cells            | CD8A                                                                                                                                                                                                                                                                                                                                                                                                                                                                                                                                                                                                                                                                                                                                                                                                                                                                                                                                                                                                                                                                                                                                                                                                                                                                                                                                                                                                                                                                                                                                                                                                                                                                                                                                               |
| CD4+ Regulatory T cells | C15orf53;CTLA4;FOXP3;GPR15;IL32;IL4;IL5                                                                                                                                                                                                                                                                                                                                                                                                                                                                                                                                                                                                                                                                                                                                                                                                                                                                                                                                                                                                                                                                                                                                                                                                                                                                                                                                                                                                                                                                                                                                                                                                                                                                                                            |
| Check-point             | IDO1;LAG3;CTLA4;TNFRSF9;ICOS;CD80;PDCD1LG2;TIGIT;CD70;TNFSF9;ICOSLG;KIR3DL1;CD86;PDCD1;LAIR1;TNFRSF8;TNFSF15;TNFRSF14;IDO2;CD276;CD40;TNFRSF4;TNFSF14;HHLA2;CD244;CD274;HAVCR2;CD27;BTLA;LGALS9;TMIGD2;CD28;CD48;TNFRSF25;CD40LG;ADORA2A;VTCN1;CD160;CD44;TNFSF18;TNFRSF18;BTNL2;C10orf54;CD200R1;TNFSF4;CD200;NRP1                                                                                                                                                                                                                                                                                                                                                                                                                                                                                                                                                                                                                                                                                                                                                                                                                                                                                                                                                                                                                                                                                                                                                                                                                                                                                                                                                                                                                                |
| Cytolytic_activity      | PRF1;GZMA                                                                                                                                                                                                                                                                                                                                                                                                                                                                                                                                                                                                                                                                                                                                                                                                                                                                                                                                                                                                                                                                                                                                                                                                                                                                                                                                                                                                                                                                                                                                                                                                                                                                                                                                          |
| DCs                     | CCL17;CCL22;CD209;CCL13                                                                                                                                                                                                                                                                                                                                                                                                                                                                                                                                                                                                                                                                                                                                                                                                                                                                                                                                                                                                                                                                                                                                                                                                                                                                                                                                                                                                                                                                                                                                                                                                                                                                                                                            |
| HLA                     | HLA-E;HLA-DPB2;HLA-C HLA-J;HLA-DQB1;HLA-DQB2;HLA-DQA2;HLA-DQA1;HLA-A;HLA-DMA;HLA-DOB;HLA-DRB1;HLA-H;HLA-B;HLA-DRB5;HLA-DOA;HLA-DPB1;HLA-DRA;HLA-DRB6;HLA-L;HLA-F;HLA-G;HLA-DMB;HLA-DPA1                                                                                                                                                                                                                                                                                                                                                                                                                                                                                                                                                                                                                                                                                                                                                                                                                                                                                                                                                                                                                                                                                                                                                                                                                                                                                                                                                                                                                                                                                                                                                            |
| iDCs                    | CD1A;CD1E                                                                                                                                                                                                                                                                                                                                                                                                                                                                                                                                                                                                                                                                                                                                                                                                                                                                                                                                                                                                                                                                                                                                                                                                                                                                                                                                                                                                                                                                                                                                                                                                                                                                                                                                          |
| Inflammation-promoting  | CCL5;CD19;CD8B;CXCL10;CXCL13;CXCL9;GNLY;GZMB;IFNG;IL12A;IL12B;IRF1;PRF1;STAT1;TBX21                                                                                                                                                                                                                                                                                                                                                                                                                                                                                                                                                                                                                                                                                                                                                                                                                                                                                                                                                                                                                                                                                                                                                                                                                                                                                                                                                                                                                                                                                                                                                                                                                                                                |
| Macrophages             | C11orf45;CD68;CLEC5A;CYBB;FUCA1;GPNMB;HS3ST2;LGMN;MMP9;TM4SF19                                                                                                                                                                                                                                                                                                                                                                                                                                                                                                                                                                                                                                                                                                                                                                                                                                                                                                                                                                                                                                                                                                                                                                                                                                                                                                                                                                                                                                                                                                                                                                                                                                                                                     |
| Mast_cells              | CMA1;MS4A2;TPSAB1                                                                                                                                                                                                                                                                                                                                                                                                                                                                                                                                                                                                                                                                                                                                                                                                                                                                                                                                                                                                                                                                                                                                                                                                                                                                                                                                                                                                                                                                                                                                                                                                                                                                                                                                  |
| MHC_class_I             | B2M;HLA-A;TAP1                                                                                                                                                                                                                                                                                                                                                                                                                                                                                                                                                                                                                                                                                                                                                                                                                                                                                                                                                                                                                                                                                                                                                                                                                                                                                                                                                                                                                                                                                                                                                                                                                                                                                                                                     |
| Neutrophils             | EVI2B;HSD17B11;KDM6B;MEGF9;MNDA;NLRP12;PADI4;SELL;TRANK1;VNN3                                                                                                                                                                                                                                                                                                                                                                                                                                                                                                                                                                                                                                                                                                                                                                                                                                                                                                                                                                                                                                                                                                                                                                                                                                                                                                                                                                                                                                                                                                                                                                                                                                                                                      |
| NK_cells                | KLRC1;KLRF1                                                                                                                                                                                                                                                                                                                                                                                                                                                                                                                                                                                                                                                                                                                                                                                                                                                                                                                                                                                                                                                                                                                                                                                                                                                                                                                                                                                                                                                                                                                                                                                                                                                                                                                                        |
| Parainflammation        | CXCL10;PLAT;CCND1;LGMN;PLAUR;AIM2;MMP7;ICAM1;MX2;CXCL9;ANXA1;TLR2;PLA2G2D;ITGA2;MX1;HMOX1;CD276;TIRAP;IL33;PTGES;TNFRSF12A;SCARB1;CD14;BLNK;IFIT3;RETNLB;IFIT2;ISG15;OAS2;REL;OAS3;CD44;PPARG;BST2;OAS1;NOX1;PLA2G2A;IFIT1;IFITM3;IL1RN                                                                                                                                                                                                                                                                                                                                                                                                                                                                                                                                                                                                                                                                                                                                                                                                                                                                                                                                                                                                                                                                                                                                                                                                                                                                                                                                                                                                                                                                                                            |
| pDCs                    | CLEC4C;CXCR3;GZMB;IL3RA;IRF7;IRF8;LILRA4;PHEX;PLD4;PTCRA                                                                                                                                                                                                                                                                                                                                                                                                                                                                                                                                                                                                                                                                                                                                                                                                                                                                                                                                                                                                                                                                                                                                                                                                                                                                                                                                                                                                                                                                                                                                                                                                                                                                                           |
| T_cell_co-inhibition    | BTLA;C10orf54;CD160;CD244;CD274;CTLA4;HAVCR2;LAG3;LAIR1;TIGIT                                                                                                                                                                                                                                                                                                                                                                                                                                                                                                                                                                                                                                                                                                                                                                                                                                                                                                                                                                                                                                                                                                                                                                                                                                                                                                                                                                                                                                                                                                                                                                                                                                                                                      |
| T_cell_co-stimulation   | CD2;CD226;CD27;CD28;CD40LG;ICOS;SLAMF1;TNFRSF18;TNFRSF25;TNFRSF4;TNFRSF8;TNFRSF9;TNFSF14                                                                                                                                                                                                                                                                                                                                                                                                                                                                                                                                                                                                                                                                                                                                                                                                                                                                                                                                                                                                                                                                                                                                                                                                                                                                                                                                                                                                                                                                                                                                                                                                                                                           |
| T_helper_cells          | CD4                                                                                                                                                                                                                                                                                                                                                                                                                                                                                                                                                                                                                                                                                                                                                                                                                                                                                                                                                                                                                                                                                                                                                                                                                                                                                                                                                                                                                                                                                                                                                                                                                                                                                                                                                |
| Tfh                     | PDCD1;CXCL13;CXCR5                                                                                                                                                                                                                                                                                                                                                                                                                                                                                                                                                                                                                                                                                                                                                                                                                                                                                                                                                                                                                                                                                                                                                                                                                                                                                                                                                                                                                                                                                                                                                                                                                                                                                                                                 |
| Th1_cells               | IFNG;TBX21;CTLA4;STAT4;CD38;IL12RB2;LTA;CSF2                                                                                                                                                                                                                                                                                                                                                                                                                                                                                                                                                                                                                                                                                                                                                                                                                                                                                                                                                                                                                                                                                                                                                                                                                                                                                                                                                                                                                                                                                                                                                                                                                                                                                                       |
| Th2_cells               | PMCH;LAIR2;SMAD2;CXCR6;GATA3;IL26                                                                                                                                                                                                                                                                                                                                                                                                                                                                                                                                                                                                                                                                                                                                                                                                                                                                                                                                                                                                                                                                                                                                                                                                                                                                                                                                                                                                                                                                                                                                                                                                                                                                                                                  |

|                     |                                                                                                                                                                                                                                                                                                                                                                                                                                                                      |
|---------------------|----------------------------------------------------------------------------------------------------------------------------------------------------------------------------------------------------------------------------------------------------------------------------------------------------------------------------------------------------------------------------------------------------------------------------------------------------------------------|
| TIL                 | ITM2C;CD38;THEMIS2;GLYR1;ICOS;F5;TIGIT;KLRD1;IRF4;PRKCQ;FCRL5;SIRPG;LPXN;IL2RG;CCL5;LCK;TRAF3<br>IP3;CD86;MAL;LILRB1;DOK2;CD6;PAG1;LAX1;PLEK;PIK3CD;SLAMF1;XCL1;GPR171;XCL2;TBX21;CD2;CD53;KL<br>HL6;SLAMF6;CD40;SIT1;TNFRSF4;CD79A;CD247;LCP2;CD3D;CD27;SH2D1A;FYB;ARHGAP30;ACAP1;CST7;CD3G<br>;IL2RB;CD3E;FCRL3;CORO1A;ITK;TCL1A;CYBB;CSF2RB;IKZF1;NCF4;DOCK2;CCR2;PTPRC;PLAC8;NCKAP1L;IL<br>7R;6-                                                                 |
|                     | Sep;CD28;STAT4;CD8A;LY9;CD48;HCST;PTPRCAP;SASH3;ARHGAP25;LAT;TRAT1;IL10RA;PAX5;CCR7;DOCK11;<br>PARVG;SPNS1;CD52;HCLS1;ARHGAP9;GIMAP6;PRKCB;MS4A1;GPR18;TBC1D10C;GVINP1;P2RY8;EVI2B;VAMP5<br>;KLRK1;SELL;MPEG1;MS4A6A;ARHGAP15;MFNG;GZMK;SELPLG;TARP;GIMAP7;FAM65B;INPP5D;ITGA4;MZB1;<br>GPSM3;STK10;CLEC2D;IL16;NLRC3;GIMAP5;GIMAP4;IFFO1;CFH;PVRIG;CFHR1                                                                                                            |
| Treg                | IL12RB2;TMPRSS6;CTSC;LAPTM4B;TFRC;RNF145;NETO2;ADAT2;CHST2;CTLA4;NFE2L3;LIMA1;IL1R2;ICOS;HS<br>DL2;HTATIP2;FKBP1A;TIGIT;CCR8;LTA;SLC35F2;IL21R;AHCYL1;SOCS2;ETV7;BCL2L1;RRAGB;ACSL4;CHRNA6;<br>BATF;LAX1;ADPRH;TNFRSF4;ANKRD10;CD274;CASP1;LY75;NPTN;SSTR3;GRSF1;CSF2RB;TMEM184C;NDFIP2;Z<br>BTB38;ERH1;TRAF3;NAB1;HS3ST3B1;LAYN;JAK1;VDR;LEPROT;GCNT1;PTPRJ;IKZF2;CSF1;ENTPD1;TNFRSF18;M<br>ETTL7A;KSR1;SSH1;CADM1;IL1R1;ACP5;CHST7;THADA;CD177;NFAT5;ZNF282;MAGEH1 |
| Type_I_IFN_Reponse  | DDX4;IFIT1;IFIT2;IFIT3;IRF7;ISG20;MX1;MX2;RSAD2;TNFSF10                                                                                                                                                                                                                                                                                                                                                                                                              |
| Type_II_IFN_Reponse | GPR146;SELP;AHR                                                                                                                                                                                                                                                                                                                                                                                                                                                      |

---

Supplementary Table 2. The mutational frequency of genes in the whole genome.

|             | Gene     | Number |
|-------------|----------|--------|
| rs121913529 | KRAS     | 90     |
| rs113488022 | BRAF     | 49     |
| rs112445441 | KRAS     | 31     |
| rs104886003 | PIK3CA   | 30     |
| rs28934578  | TP53     | 26     |
| rs121913332 | APC      | 25     |
| rs781215815 | RNF43    | 22     |
| rs121913530 | KRAS     | 19     |
| rs782665429 | DOCK3    | 18     |
| rs121913279 | PIK3CA   | 17     |
| rs764719749 | ACVR2A   | 15     |
| rs121913333 | APC      | 14     |
| rs11540652  | TP53     | 13     |
| rs772920507 | BMPR2    | 13     |
| rs121913527 | KRAS     | 13     |
| rs28934574  | TP53     | 12     |
| rs28934576  | TP53     | 12     |
| rs587781392 | APC      | 12     |
| rs121913273 | PIK3CA   | 12     |
| rs770033147 | SVIL     | 11     |
| rs121913331 | APC      | 11     |
| rs121913287 | PIK3CA   | 11     |
| rs397516436 | TP53     | 10     |
| rs62619935  | APC      | 10     |
| rs549924573 | RCVRN    | 10     |
| rs759765382 | RPL22    | 9      |
| rs763321097 | TEAD2    | 9      |
| rs372217972 | QKI      | 9      |
| rs767148651 | HNRNPL   | 8      |
| rs137854574 | APC      | 8      |
| rs759448855 | GLI1     | 8      |
| rs121912651 | TP53     | 8      |
| rs137854580 | APC      | 8      |
| rs121913343 | TP53     | 8      |
| rs199566425 | C9orf47  | 7      |
| rs377767347 | SMAD4    | 7      |
| rs778658185 | BCORL1   | 7      |
| rs756774416 | LMNTD2   | 7      |
| rs781677398 | ZDHHC8   | 7      |
| rs766438669 | CSMD3    | 7      |
| rs397515734 | APC      | 7      |
| rs775633847 | RAB28    | 7      |
| rs762648935 | MBD6     | 7      |
| rs143104828 | CSF2RA   | 6      |
| rs746563015 | CNTLN    | 6      |
| rs762448666 | ELMSAN1  | 6      |
| rs121913237 | NRAS     | 6      |
| rs121913329 | APC      | 6      |
| rs777980924 | FHOD3    | 6      |
| rs762805003 | CD93     | 6      |
| rs761047150 | C9orf131 | 6      |
| rs563361433 | ONECUT1  | 6      |
| rs748072217 | KIAA1024 | 6      |
| rs778388564 | PCDH19   | 6      |

|             |        |   |
|-------------|--------|---|
| rs151073460 | FUS    | 6 |
| rs748349403 | SLC8A2 | 6 |
| rs765803753 | MICAL3 | 6 |
| rs748850271 | PHGR1  | 6 |

---

The table shows mutational frequency of locus more than 5.

**Supplementary Table 3. The enrichment level of 30 immune signature in KRAS-mutated and wild-type groups were compared by Mann-Whitney test.**

| <b>Immune Term</b>      | <b>P Value</b>  |
|-------------------------|-----------------|
| pDCs                    | <b>0.000284</b> |
| Treg                    | <b>0.000637</b> |
| Inflammation_promoting  | <b>0.002</b>    |
| Th1_cells               | <b>0.011</b>    |
| HLA                     | <b>0.012</b>    |
| T_cell_co_stimulation   | <b>0.014</b>    |
| Cytolytic_activity      | <b>0.015</b>    |
| TIL                     | <b>0.015</b>    |
| T_cell_co_inhibition    | <b>0.023</b>    |
| T_helper_cells          | <b>0.024</b>    |
| Neutrophils             | <b>0.026</b>    |
| Macrophages             | <b>0.033</b>    |
| Check_point             | <b>0.037</b>    |
| DCs                     | 0.056           |
| Tfh                     | 0.067           |
| CCR                     | 0.069           |
| aDCs                    | 0.076           |
| Type_II_IFN_Response    | 0.083           |
| CD4+_Regulatory_T_cells | 0.132           |
| Type_I_IFN_Response     | 0.158           |
| Th2_cells               | 0.176           |
| B_cells                 | 0.205           |
| CD8+_T_Cells            | 0.225           |
| Mast_cells              | 0.275           |
| APC_co_stimulation      | 0.289           |
| MHC_class_I             | 0.468           |
| NK_cells                | 0.608           |
| iDcs                    | 0.67            |
| Parainflammation        | 0.831           |
| APC_co_inhibition       | 0.998           |
