# Supplementary material for: KRAS mutations are negatively correlated with immunity in colon cancer
Source: PubMed Central journal article supplement (PMC7834984; doi:10.18632/aging.202182), 2020-11-26
Supplement: aging-13-202182-s004.pdf [file aging-13-202182-s004.pdf]

## SUPPLEMENTARY TABLE

Supplementary Table 5. Comparing the expression of genes in inflammation-activities signature between KRAS-mutated and wild-type groups.

| Gene          | WildMean | MutationMean | logFC    | pValue          |
|---------------|----------|--------------|----------|-----------------|
| <b>IL12A</b>  | 0.282451 | 0.430636     | 0.608472 | <b>3.36E-06</b> |
| <b>GZMB</b>   | 7.518245 | 13.26506     | 0.819164 | <b>4.63E-06</b> |
| <b>CXCL9</b>  | 12.71954 | 17.27174     | 0.441366 | <b>0.001911</b> |
| <b>CXCL10</b> | 24.05325 | 29.22686     | 0.281063 | <b>0.006641</b> |
| <b>PRF1</b>   | 3.191711 | 4.06926      | 0.350436 | <b>0.009838</b> |
| <b>CXCL13</b> | 4.056069 | 6.041906     | 0.574921 | <b>0.020125</b> |
| <b>GNLY</b>   | 2.000802 | 2.894216     | 0.532595 | <b>0.021077</b> |
| <b>IFNG</b>   | 0.27372  | 0.389159     | 0.507657 | <b>0.028949</b> |
| <b>STAT1</b>  | 37.46403 | 44.23563     | 0.239703 | <b>0.049644</b> |
| <b>TBX21</b>  | 0.247669 | 0.293948     | 0.247147 | 0.061036        |
| <b>IRF1</b>   | 15.09839 | 17.20898     | 0.188767 | 0.064267        |
| <b>CCL5</b>   | 12.90831 | 15.46207     | 0.260433 | 0.186282        |
| <b>CD8B</b>   | 1.457315 | 1.674802     | 0.200678 | 0.279428        |
| <b>CD19</b>   | 0.511267 | 0.742265     | 0.537859 | 0.283726        |
| <b>IL12B</b>  | 0.033961 | 0.038595     | 0.184569 | 0.507014        |
