# Supplementary material for: KRAS mutations are negatively correlated with immunity in colon cancer
Source: PubMed Central journal article supplement (PMC7834984; doi:10.18632/aging.202182), 2020-11-26
Supplement: aging-13-202182-s007.pdf [file aging-13-202182-s007.pdf]

## SUPPLEMENTARY TABLE

**Supplementary Table 8. The annotations of differentially expressed genes with strong correlation with immune score.**

| Gene names | Entry  | Protein names                                                                   | Length |
|------------|--------|---------------------------------------------------------------------------------|--------|
| STX11      | O75558 | Syntaxin-11                                                                     | 287    |
| DOK2       | O60496 | Docking protein 2 (Downstream of tyrosine kinase 2)                             | 412    |
| TNFAIP8L2  | Q6P589 | Tumor necrosis factor alpha-induced protein 8-like protein 2                    | 184    |
| LCP2       | Q13094 | Lymphocyte cytosolic protein 2                                                  | 533    |
| LILRB1     | Q8NHL6 | Leukocyte immunoglobulin-like receptor subfamily B member 1                     | 650    |
| ABI3       | Q9P2A4 | ABI gene family member 3                                                        | 366    |
| LRRK25     | Q8N386 | Leucine-rich repeat-containing protein 25                                       | 305    |
| SASH3      | O75995 | SAM and SH3 domain-containing protein 3                                         | 380    |
| CD300A     | Q9UGN4 | CMRF35-like molecule 8                                                          | 299    |
| LAIR1      | Q6GTX8 | Leukocyte-associated immunoglobulin-like receptor 1                             | 287    |
| MS4A6A     | Q9H2W1 | Membrane-spanning 4-domains subfamily A member 6A                               | 248    |
| SCIMP      | Q6UWF3 | SLP adapter and CSK-interacting membrane protein                                | 145    |
| APBB1IP    | Q7Z5R6 | Amyloid beta A4 precursor protein-binding family B member 1-interacting protein | 666    |
| HCLS1      | P14317 | Hematopoietic lineage cell-specific protein                                     | 486    |
| C3AR1      | Q16581 | C3a anaphylatoxin chemotactic receptor                                          | 482    |
| IL2RA      | P01589 | Interleukin-2 receptor subunit alpha                                            | 272    |
| HAVCR2     | Q8TDQ0 | Hepatitis A virus cellular receptor 2                                           | 301    |
| CD300LF    | Q8TDQ1 | CMRF35-like molecule 1 (Immune receptor expressed on myeloid cells 1)           | 290    |
| LST1       | O00453 | Leukocyte-specific transcript 1 protein                                         | 97     |
| LST1       | Q9Y6L6 | Solute carrier organic anion transporter family member 1B1                      | 691    |
| SLAMF8     | Q9P0V8 | SLAM family member 8 (B-lymphocyte activator macrophage expressed)              | 285    |
| C10orf128  | Q5T292 | Transmembrane protein 273                                                       | 105    |
| CD86       | P42081 | T-lymphocyte activation antigen CD86                                            | 329    |
| IL10RA     | Q13651 | Interleukin-10 receptor subunit alpha                                           | 578    |
| CYTH4      | Q9UIA0 | Cytohesin-4                                                                     | 394    |
